# Supplementary material for: Andrographolide induces protective autophagy and targeting DJ-1 triggers reactive oxygen species-induced cell death in pancreatic cancer
Source: PeerJ journal article supplement (doi:10.7717/peerj.17619), 2024-06-28
Supplement: MIQE_checklist.pdf [file MIQE_checklist.pdf]

**Table 1. MIQE checklist for authors, reviewers, and editors.<sup>a</sup>**

| Item to check                                                                     | Importance    | Item to check                                                            | Importance    |
|-----------------------------------------------------------------------------------|---------------|--------------------------------------------------------------------------|---------------|
| Experimental design                                                               |               | qPCR oligonucleotides                                                    |               |
| Definition of experimental and control groups                                     | line 549      | Primer sequences                                                         | Table 1       |
| Number within each group                                                          | line 189      | RTPrimerDB identification number                                         | ×             |
| Assay carried out by the core or investigator's laboratory?                       | line 389      | Probe sequences                                                          | ×             |
| Acknowledgment of authors' contributions                                          | line 389      | Location and identity of any modifications                               | ×             |
| Sample                                                                            |               | Manufacturer of oligonucleotides                                         | ×             |
| Description                                                                       | line 183      | Purification method                                                      | line 184      |
| Volume/mass of sample processed                                                   | √             | qPCR protocol                                                            |               |
| Microdissection or macrodissection                                                | ×             | Complete reaction conditions                                             | line 186      |
| Processing procedure                                                              | line 183      | Reaction volume and amount of cDNA/DNA                                   | line 185      |
| If frozen, how and how quickly?                                                   | √             | Primer, (probe), Mg <sup>2+</sup> , and dNTP concentrations              | line 186      |
| If fixed, with what and how quickly?                                              | ×             | Polymerase identity and concentration                                    | ×             |
| Sample storage conditions and duration (especially for FFPE <sup>b</sup> samples) | ×             | Buffer/kit identity and manufacturer                                     | line 188      |
| Nucleic acid extraction                                                           |               | Exact chemical composition of the buffer                                 | √             |
| Procedure and/or instrumentation                                                  | line 183      | Additives (SYBR Green I, DMSO, and so forth)                             | line 188      |
| Name of kit and details of any modifications                                      | line 183      | Manufacturer of plates/tubes and catalog number                          | line 188      |
| Source of additional reagents used                                                | ×             | Complete thermocycling parameters                                        | √             |
| Details of DNase or RNase treatment                                               | line 183      | Reaction setup (manual/robotic)                                          | ×             |
| Contamination assessment (DNA or RNA)                                             | line 183      | Manufacturer of qPCR instrument                                          | line 188      |
| Nucleic acid quantification                                                       | √             | qPCR validation                                                          |               |
| Instrument and method                                                             | line 183      | Evidence of optimization (from gradients)                                | ×             |
| Purity ( $A_{260}/A_{280}$ )                                                      | √             | Specificity (gel, sequence, melt, or digest)                             | ×             |
| Yield                                                                             | √             | For SYBR Green I, $C_q$ of the NTC                                       | original data |
| RNA integrity: method/instrument                                                  | √             | Calibration curves with slope and y intercept                            | √             |
| RIN/RQI or $C_q$ of 3' and 5' transcripts                                         | original data | PCR efficiency calculated from slope                                     | √             |
| Electrophoresis traces                                                            | ×             | CI for PCR efficiency or SE                                              | ×             |
| Inhibition testing ( $C_q$ dilutions, spike, or other)                            | ×             | $r^2$ of calibration curve                                               | √             |
| Reverse transcription                                                             |               | Linear dynamic range                                                     | √             |
| Complete reaction conditions                                                      | √             | $C_q$ variation at LOD                                                   | ×             |
| Amount of RNA and reaction volume                                                 | √             | CI through range                                                         | ×             |
| Priming oligonucleotide (if using GSP) and concentration                          | √             | Evidence for LOD                                                         | ×             |
| Reverse transcriptase and concentration                                           | line 184      | If multiplex, efficiency and LOD of each assay                           | √             |
| Temperature and time                                                              | √             | Data analysis                                                            |               |
| Manufacturer of reagents and catalogue numbers                                    | √             | qPCR analysis program (source, version)                                  | line 188      |
| $C_q$ s with and without reverse transcription                                    | original data | Method of $C_q$ determination                                            | line 188      |
| Storage conditions of cDNA                                                        | ×             | Outlier identification and disposition                                   | √             |
| qPCR target information                                                           |               | Results for NTCs                                                         | ×             |
| Gene symbol                                                                       | table 1       | Justification of number and choice of reference genes                    | √             |
| Sequence accession number                                                         | ×             | Description of normalization method                                      | line 190      |
| Location of amplicon                                                              | √             | Number and concordance of biological replicates                          | ×             |
| Amplicon length                                                                   | √             | Number and stage (reverse transcription or qPCR) of technical replicates | line 182      |
| In silico specificity screen (BLAST, and so on)                                   | √             | Repeatability (intraassay variation)                                     | line 190      |
| Pseudogenes, retropseudogenes, or other homologs?                                 | ×             | Reproducibility (interassay variation, CV)                               | √             |
| Sequence alignment                                                                | ×             | Power analysis                                                           | ×             |
| Secondary structure analysis of amplicon                                          | ×             | Statistical methods for results significance                             | line 190      |
| Location of each primer by exon or intron (if applicable)                         | ×             | Software (source, version)                                               | line 230      |
| What splice variants are targeted?                                                | ×             | $C_q$ or raw data submission with RDML                                   | original data |

<sup>a</sup> All essential information (E) must be submitted with the manuscript. Desirable information (D) should be submitted if available. If primers are from RTPrimerDB, information on qPCR target, oligonucleotides, protocols, and validation is available from that source.

<sup>b</sup> FFPE, formalin-fixed, paraffin-embedded; RIN, RNA integrity number; RQI, RNA quality indicator; GSP, gene-specific priming; dNTP, deoxynucleoside triphosphate.

<sup>c</sup> Assessing the absence of DNA with a no–reverse transcription assay is essential when first extracting RNA. Once the sample has been validated as DNA free, inclusion of a no–reverse transcription control is desirable but no longer essential.

<sup>d</sup> Disclosure of the probe sequence is highly desirable and strongly encouraged; however, because not all vendors of commercial predesigned assays provide this information, it cannot be an essential requirement. Use of such assays is discouraged.
