# Supplementary material for: Andrographolide induces protective autophagy and targeting DJ-1 triggers reactive oxygen species-induced cell death in pancreatic cancer
Source: PeerJ journal article supplement (doi:10.7717/peerj.17619), 2024-06-28
Supplement: raw_data.zip [file raw_data.zip]

## Sheet: PANC-1
Measurement count: 1 Filter: 450
	1	2	3	4	5	6	7	8	9	10	11
A	0.095	0.931	0.254	0.815	0.215	0.825	0.256	0.555	0.238	0.514	0.228
B	0.261	0.892	0.266	0.786	0.252	0.799	0.234	0.536	0.186	0.458	0.227
C	0.362	0.904	0.197	0.901	0.231	0.776	0.216	0.564	0.243	0.496	0.241
D	0.618	0.923	0.219	0.784	0.224	0.724	0.223	0.51	0.202	0.036	0.033
E	1.065	0.948	0.192	0.755	0.22	0.761	0.236	0.478	0.234	0.03	0.035
F	1.949	0.894	0.209	0.799	0.245	0.713	0.184	0.496	0.211	0.033	0.03
G	0.035	0.037	0.035	0.034	0.036	0.03	0.033	0.031	0.03	0.03	0.035
H	0.038	0.034	0.036	0.035	0.033	0.035	0.03	0.035	0.034	0.033	0.03
	标准管
标准品浓度/ (μmol·mL-1)	OD450			x值
	1
0	0.095			0
0.125	0.261			0.166
0.25	0.362			0.267
0.5	0.618			0.523
1	1.065			0.97
2	1.949			1.854
	测定管	对照管
样本编号	OD450		△A	x值	y值/ (μmol·mL-1)	样本蛋白质浓度/ (mg·mL-1)	LDH活力/ (U·mg-1 prot)
	2	3
0μM-1	0.931	0.254	0.677	0.582	0.593395	93	0.425585
0μM-2	0.892	0.266	0.626	0.531	0.537733	93	0.385665
0μM-3	0.904	0.197	0.707	0.612	0.626137	93	0.449068
样本编号	OD450		△A	x值	y值/ (μmol·mL-1)	样本蛋白质浓度/ (mg·mL-1)	LDH活力/ (U·mg-1 prot)
	2	3
2.5μM-1	0.923	0.219	0.704	0.609	0.622863	107	0.38827
2.5μM-2	0.948	0.192	0.756	0.661	0.679615	107	0.423648
2.5μM-3	0.894	0.209	0.685	0.59	0.602126	107	0.375344
样本编号	OD450		△A	x值	y值/ (μmol·mL-1)	样本蛋白质浓度/ (mg·mL-1)	LDH活力/ (U·mg-1 prot)
	4	5
5μM-1	0.815	0.215	0.6	0.505	0.509357	93	0.365313
5μM-2	0.786	0.252	0.534	0.439	0.437325	93	0.313651
5μM-3	0.901	0.231	0.67	0.575	0.585755	93	0.420106
样本编号	OD450		△A	x值	y值/ (μmol·mL-1)	样本蛋白质浓度/ (mg·mL-1)	LDH活力/ (U·mg-1 prot)
	4	5
10μM-1	0.784	0.224	0.56	0.465	0.465701	95	0.326971
10μM-2	0.755	0.22	0.535	0.44	0.438416	95	0.307814
10μM-3	0.799	0.245	0.554	0.459	0.459153	95	0.322373
样本编号	OD450		△A	x值	y值/ (μmol·mL-1)	样本蛋白质浓度/ (mg·mL-1)	LDH活力/ (U·mg-1 prot)
	6	7
20μM-1	0.825	0.256	0.569	0.474	0.475524	103	0.307936
20μM-2	0.799	0.234	0.565	0.47	0.471158	103	0.305109
20μM-3	0.776	0.216	0.56	0.465	0.465701	103	0.301575
样本编号	OD450		△A	x值	y值/ (μmol·mL-1)	样本蛋白质浓度/ (mg·mL-1)	LDH活力/ (U·mg-1 prot)
	6	7
40μM-1	0.724	0.223	0.501	0.406	0.401308	105	0.254926
40μM-2	0.761	0.236	0.525	0.43	0.427502	105	0.271566
40μM-3	0.713	0.184	0.529	0.434	0.431868	105	0.274339
样本编号	OD450		△A	x值	y值/ (μmol·mL-1)	样本蛋白质浓度/ (mg·mL-1)	LDH活力/ (U·mg-1 prot)
	8	9
60μM-1	0.555	0.238	0.317	0.222	0.200491	93	0.143793
60μM-2	0.536	0.186	0.35	0.255	0.236507	93	0.169624
60μM-3	0.564	0.243	0.321	0.226	0.204856	93	0.146924
样本编号	OD450		△A	x值	y值/ (μmol·mL-1)	样本蛋白质浓度/ (mg·mL-1)	LDH活力/ (U·mg-1 prot)
	8	9
80μM-1	0.51	0.202	0.308	0.213	0.190668	95	0.133869
80μM-2	0.478	0.234	0.244	0.149	0.120819	95	0.0848274
80μM-3	0.496	0.211	0.285	0.19	0.165566	95	0.116245
样本编号	OD450		△A	x值	y值/ (μmol·mL-1)	样本蛋白质浓度/ (mg·mL-1)	LDH活力/ (U·mg-1 prot)
	10	11
100μM-1	0.514	0.228	0.286	0.191	0.166657	99	0.112283
100μM-2	0.458	0.227	0.231	0.136	0.10663	99	0.0718409
100μM-3	0.496	0.241	0.255	0.16	0.132824	99	0.0894885

## Sheet: BxPC3
Measurement count: 1 Filter: 450
	1	2	3	4	5	6	7	8	9	10	11
A	0.095	0.928	0.241	0.869	0.222	0.882	0.242	0.541	0.241	0.496	0.227
B	0.261	0.873	0.263	0.854	0.218	0.827	0.219	0.512	0.207	0.507	0.238
C	0.362	0.905	0.247	0.819	0.201	0.785	0.236	0.529	0.218	0.514	0.261
D	0.618	0.965	0.22	0.784	0.237	0.769	0.227	0.506	0.212	0.03	0.035
E	1.065	0.945	0.241	0.848	0.266	0.754	0.194	0.486	0.199	0.033	0.032
F	1.949	0.937	0.258	0.779	0.239	0.685	0.216	0.492	0.209	0.031	0.035
G	0.033	0.037	0.034	0.034	0.035	0.03	0.031	0.03	0.033	0.036	0.03
H	0.03	0.035	0.036	0.031	0.033	0.033	0.03	0.035	0.03	0.032	0.033
	标准管
标准品浓度/ (μmol·mL-1)	OD450			x值
	1
0	0.095			0
0.125	0.261			0.166
0.25	0.362			0.267
0.5	0.618			0.523
1	1.065			0.97
2	1.949			1.854
	测定管	对照管
样本编号	OD450		△A	x值	y值/ (μmol·mL-1)	样本蛋白质浓度/ (mg·mL-1)	LDH活力/ (U·mg-1 prot)
	2	3
0μM-1	0.928	0.241	0.687	0.592	0.604309	97	0.41554
0μM-2	0.873	0.263	0.61	0.515	0.520271	97	0.357753
0μM-3	0.905	0.247	0.658	0.563	0.572658	97	0.393776
样本编号	OD450		△A	x值	y值/ (μmol·mL-1)	样本蛋白质浓度/ (mg·mL-1)	LDH活力/ (U·mg-1 prot)
	2	3
2.5μM-1	0.965	0.22	0.745	0.65	0.66761	109	0.408528
2.5μM-2	0.945	0.241	0.704	0.609	0.622863	109	0.381146
2.5μM-3	0.937	0.258	0.679	0.584	0.595578	109	0.36445
样本编号	OD450		△A	x值	y值/ (μmol·mL-1)	样本蛋白质浓度/ (mg·mL-1)	LDH活力/ (U·mg-1 prot)
	4	5
5μM-1	0.869	0.222	0.647	0.552	0.560653	97	0.385521
5μM-2	0.854	0.218	0.636	0.541	0.548647	97	0.377266
5μM-3	0.819	0.201	0.618	0.523	0.529002	97	0.363757
样本编号	OD450		△A	x值	y值/ (μmol·mL-1)	样本蛋白质浓度/ (mg·mL-1)	LDH活力/ (U·mg-1 prot)
	4	5
10μM-1	0.784	0.237	0.547	0.452	0.451513	92	0.327347
10μM-2	0.848	0.266	0.582	0.487	0.489712	92	0.355041
10μM-3	0.779	0.239	0.54	0.445	0.443873	92	0.321808
样本编号	OD450		△A	x值	y值/ (μmol·mL-1)	样本蛋白质浓度/ (mg·mL-1)	LDH活力/ (U·mg-1 prot)
	6	7
20μM-1	0.882	0.242	0.64	0.545	0.553013	103	0.358116
20μM-2	0.827	0.219	0.608	0.513	0.518088	103	0.3355
20μM-3	0.785	0.236	0.549	0.454	0.453696	103	0.293801
样本编号	OD450		△A	x值	y值/ (μmol·mL-1)	样本蛋白质浓度/ (mg·mL-1)	LDH活力/ (U·mg-1 prot)
	6	7
40μM-1	0.769	0.227	0.542	0.447	0.446056	101	0.294573
40μM-2	0.754	0.194	0.56	0.465	0.465701	101	0.307547
40μM-3	0.685	0.216	0.469	0.374	0.366384	101	0.241958
样本编号	OD450		△A	x值	y值/ (μmol·mL-1)	样本蛋白质浓度/ (mg·mL-1)	LDH活力/ (U·mg-1 prot)
	8	9
60μM-1	0.541	0.241	0.3	0.205	0.181937	91	0.133354
60μM-2	0.512	0.207	0.305	0.21	0.187394	91	0.137354
60μM-3	0.529	0.218	0.311	0.216	0.193942	91	0.142153
样本编号	OD450		△A	x值	y值/ (μmol·mL-1)	样本蛋白质浓度/ (mg·mL-1)	LDH活力/ (U·mg-1 prot)
	8	9
80μM-1	0.506	0.212	0.294	0.199	0.175389	94	0.124451
80μM-2	0.486	0.199	0.287	0.192	0.167749	94	0.11903
80μM-3	0.492	0.209	0.283	0.188	0.163383	94	0.115933
样本编号	OD450		△A	x值	y值/ (μmol·mL-1)	样本蛋白质浓度/ (mg·mL-1)	LDH活力/ (U·mg-1 prot)
	10	11
100μM-1	0.496	0.227	0.269	0.174	0.148104	97	0.10184
100μM-2	0.507	0.238	0.269	0.174	0.158537	97	0.109015
100μM-3	0.514	0.261	0.253	0.158	0.141256	97	0.0971316

## Sheet: PaTu8988
Measurement count: 1 Filter: 450
	1	2	3	4	5	6	7	8	9	10	11
A	0.095	0.931	0.252	0.859	0.215	0.867	0.257	0.581	0.241	0.517	0.231
B	0.261	0.849	0.218	0.884	0.261	0.779	0.218	0.509	0.208	0.584	0.266
C	0.362	0.855	0.249	0.775	0.208	0.826	0.294	0.481	0.184	0.482	0.207
D	0.618	0.926	0.218	0.804	0.262	0.778	0.238	0.524	0.205	0.033	0.032
E	1.065	0.843	0.249	0.756	0.249	0.668	0.257	0.618	0.249	0.031	0.035
F	1.949	0.952	0.251	0.789	0.277	0.713	0.274	0.551	0.262	0.036	0.03
G	0.033	0.031	0.036	0.032	0.033	0.03	0.034	0.036	0.035	0.032	0.033
H	0.032	0.035	0.03	0.033	0.037	0.035	0.031	0.032	0.033	0.034	0.031
	标准管
标准品浓度/ (μmol·mL-1)	OD450			x值
	1
0	0.095			0
0.125	0.261			0.166
0.25	0.362			0.267
0.5	0.618			0.523
1	1.065			0.97
2	1.949			1.854
	测定管	对照管
样本编号	OD450		△A	x值	y值/ (μmol·mL-1)	样本蛋白质浓度/ (mg·mL-1)	LDH活力/ (U·mg-1 prot)
	2	3
0μM-1	0.931	0.252	0.679	0.584	0.595578	98	0.405357
0μM-2	0.849	0.218	0.631	0.536	0.54319	98	0.369702
0μM-3	0.855	0.249	0.606	0.511	0.515905	98	0.351132
样本编号	OD450		△A	x值	y值/ (μmol·mL-1)	样本蛋白质浓度/ (mg·mL-1)	LDH活力/ (U·mg-1 prot)
	2	3
2.5μM-1	0.926	0.218	0.708	0.613	0.627228	105	0.398439
2.5μM-2	0.843	0.249	0.594	0.499	0.502809	105	0.319403
2.5μM-3	0.952	0.251	0.701	0.606	0.619588	105	0.393586
样本编号	OD450		△A	x值	y值/ (μmol·mL-1)	样本蛋白质浓度/ (mg·mL-1)	LDH活力/ (U·mg-1 prot)
	4	5
5μM-1	0.859	0.215	0.644	0.549	0.557379	99	0.375527
5μM-2	0.884	0.261	0.623	0.528	0.534459	99	0.360085
5μM-3	0.775	0.208	0.567	0.472	0.473341	99	0.318907
样本编号	OD450		△A	x值	y值/ (μmol·mL-1)	样本蛋白质浓度/ (mg·mL-1)	LDH活力/ (U·mg-1 prot)
	4	5
10μM-1	0.804	0.262	0.542	0.447	0.446056	95	0.313178
10μM-2	0.756	0.249	0.507	0.412	0.407857	95	0.286358
10μM-3	0.789	0.277	0.512	0.417	0.413314	95	0.29019
样本编号	OD450		△A	x值	y值/ (μmol·mL-1)	样本蛋白质浓度/ (mg·mL-1)	LDH活力/ (U·mg-1 prot)
	6	7
20μM-1	0.867	0.257	0.61	0.515	0.520271	109	0.318368
20μM-2	0.779	0.218	0.561	0.466	0.466792	109	0.285643
20μM-3	0.826	0.294	0.532	0.437	0.435142	109	0.266275
样本编号	OD450		△A	x值	y值/ (μmol·mL-1)	样本蛋白质浓度/ (mg·mL-1)	LDH活力/ (U·mg-1 prot)
	6	7
40μM-1	0.778	0.238	0.54	0.445	0.443873	104	0.284676
40μM-2	0.668	0.257	0.411	0.316	0.303082	104	0.194381
40μM-3	0.713	0.274	0.439	0.344	0.333642	104	0.21398
样本编号	OD450		△A	x值	y值/ (μmol·mL-1)	样本蛋白质浓度/ (mg·mL-1)	LDH活力/ (U·mg-1 prot)
	8	9
60μM-1	0.581	0.241	0.34	0.245	0.225593	92	0.163555
60μM-2	0.509	0.208	0.301	0.206	0.183028	92	0.132696
60μM-3	0.481	0.184	0.297	0.202	0.178663	92	0.129531
样本编号	OD450		△A	x值	y值/ (μmol·mL-1)	样本蛋白质浓度/ (mg·mL-1)	LDH活力/ (U·mg-1 prot)
	8	9
80μM-1	0.524	0.205	0.319	0.224	0.202674	94	0.143812
80μM-2	0.618	0.249	0.369	0.274	0.257244	94	0.182533
80μM-3	0.551	0.262	0.289	0.194	0.169932	94	0.120579
样本编号	OD450		△A	x值	y值/ (μmol·mL-1)	样本蛋白质浓度/ (mg·mL-1)	LDH活力/ (U·mg-1 prot)
	10	11
100μM-1	0.517	0.231	0.286	0.191	0.166657	91	0.122154
100μM-2	0.584	0.266	0.318	0.223	0.211462	91	0.154995
100μM-3	0.482	0.207	0.275	0.18	0.165018	91	0.120953
